# Supplementary material
Source: PubMed Central journal article supplement (PMC5905707)
Supplement: NIHMS958390-supplement-Supplemental.pdf [file NIHMS958390-supplement-Supplemental.pdf]

**Supplementary Information for:**

**X-ray and EPR Characterization of the Auxiliary Fe-S clusters in the Radical SAM Enzyme PqqE**

Ian Barr,<sup>#&</sup> Troy A. Stich,<sup>Δ</sup> Anthony Gizzi,<sup>°</sup> Tyler Grove,<sup>°</sup> Jeffrey B. Bonanno,<sup>°</sup> John A. Latham,<sup>†</sup>  
Tyler Chung<sup>#</sup>, Carrie M. Wilmot,<sup>§</sup> R. David Britt,<sup>Δ</sup> Steven C. Almo,<sup>°</sup> and Judith P. Klinman<sup>##%\*</sup>

<sup>#</sup>California Institute for Quantitative Biosciences, <sup>+</sup>Department of Chemistry, <sup>%</sup>Department of Molecular and Cell Biology, University of California, Berkeley, California 94720, United States

<sup>Δ</sup>Department of Chemistry, University of California, Davis, California 95695, United States

<sup>°</sup>Department of Biochemistry, Albert Einstein School of Medicine, Bronx, NY 10461, United States

<sup>†</sup>Department of Chemistry and Biochemistry, University of Denver, Denver, Colorado 80222, United States

<sup>§</sup>Department of Biochemistry, Molecular Biology, and Biophysics, and The Biotechnology Institute, University of Minnesota, St. Paul, MN 55108, United States

**Table of Contents:**

- Figure S1:** Structural similarity of *MePqqE* and MoaA.
- Figure S2.** Continuous-wave EPR of dithionite reduced reconstituted wild-type PqqE and PqqE -RS.
- Table S1.** g-Values for Cys<sub>3</sub>Asp Clusters and for Auxiliary [4Fe-4S]<sup>+</sup> Clusters in Radical SAM Enzymes.
- References.**

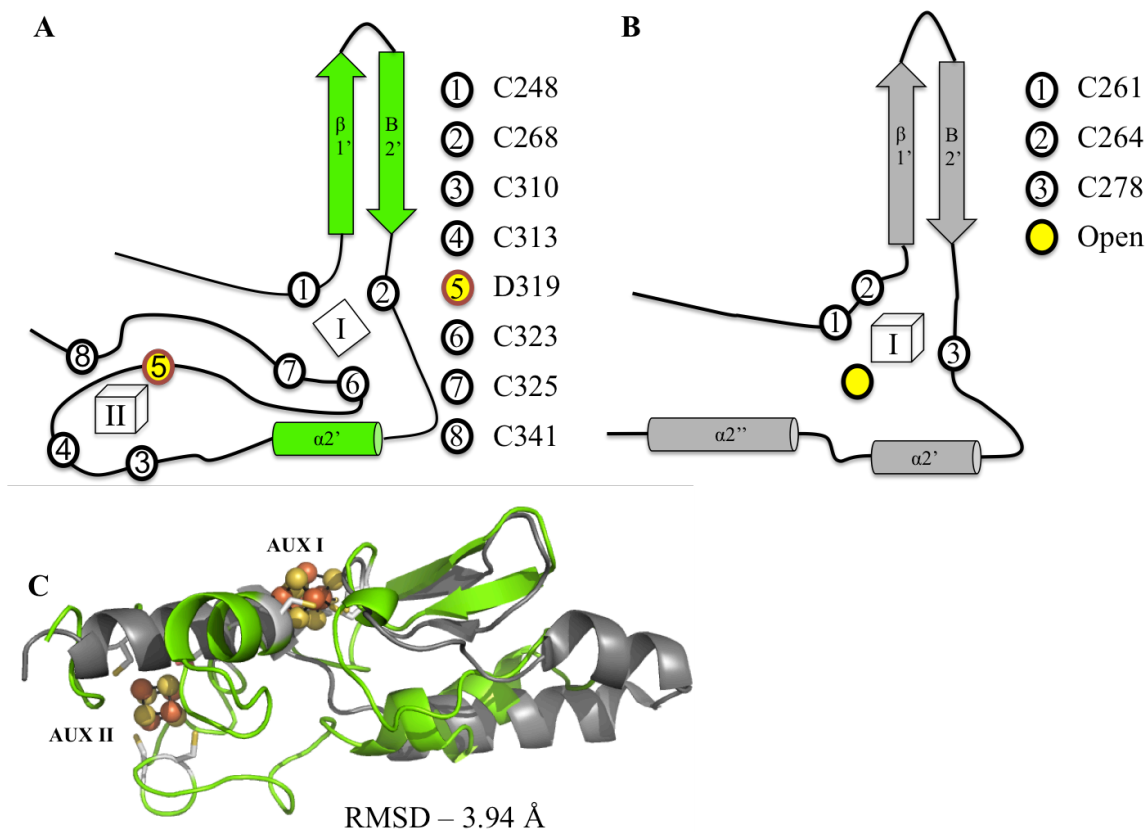

**Figure S1:** Structural similarity of *MePqqE* and *MoaA* (1TV7<sup>1</sup>). Secondary topology of *MePqqE* (A) and *MoaA* (B) show the ligation of auxiliary cluster(s). AuxI and Aux II are labeled as I and II. Ligating residues are represented by circles and corresponding residue numbers are shown to the right of each topological rendering. Asp 319 is shown for *MePqqE* by a number 5 and yellow highlighting. The yellow circle on *MoaA* represents the open coordination site and point of GTP binding. (C) Structural alignment of the SPASM domains of *MePqqE* (green) and *MoaA* (grey; RMSD 3.94 Å).

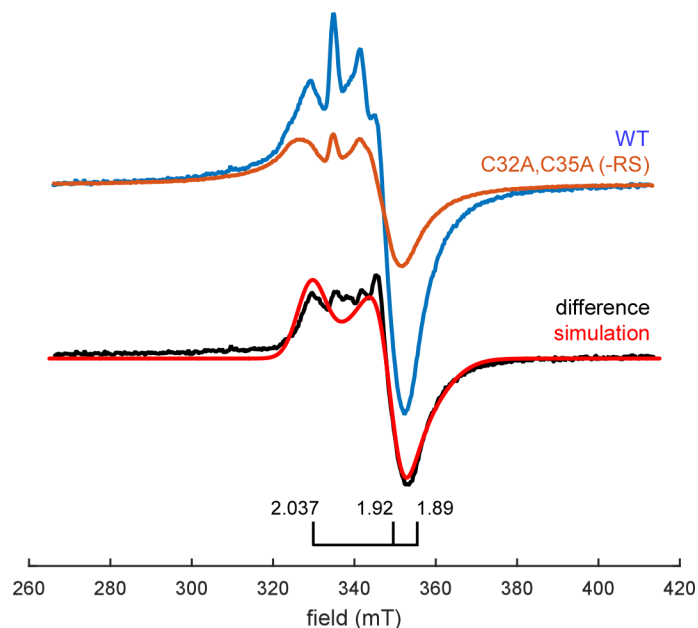

**Figure S2.** Continuous-wave EPR of dithionite reduced reconstituted wild-type PqqE and PqqE - RS. Spectra are scaled arbitrarily in order to generate a reasonable difference spectrum that should correspond to the EPR signal of the RS cluster (black trace). From this difference, the contribution from the  $[2\text{Fe}-2\text{S}]^+$  cluster is also removed by subtracting the 60 K spectrum from each trace. We note that the simulation (red trace) does not accurately predict the spectral intensity seen between  $g_1$  and  $g_2$  (330 mT–350 mT). Subtle lineshape changes are possible when dipolar interactions between the three clusters are turned off as mutagenesis prevents one cluster from forming. Importantly, the simulation of the RS cluster signal does not account for the spectral intensity observed at fields lower than that corresponding to  $g > 2.037$  in the spectrum of wild-type PqqE and PqqE - RS.

**Table S1.** g-Values for Cys<sub>3</sub>Asp Clusters and for Auxiliary [4Fe-4S]<sup>+</sup> Clusters in Radical SAM

Enzymes

| [4Fe-4S] <sup>+</sup>                                                                           | cluster ligation                                                                  | g <sub>1,2,3</sub> -values                                                                             | E° (mV vs SHE) | ref                                       |
|-------------------------------------------------------------------------------------------------|-----------------------------------------------------------------------------------|--------------------------------------------------------------------------------------------------------|----------------|-------------------------------------------|
| aconitase<br>w/ <i>cis</i> -aconitate<br>w/ <i>trans</i> -aconitate<br>w/ nitroisocitrate       |                                                                                   | 2.06, 1.93, 1.86<br>2.04, 1.85, 1.78<br>2.01, 1.88, 1.80<br>2.04, 1.87, 1.77                           |                | 2,3                                       |
| <b>Clusters w/ Cys<sub>3</sub>Asp Ligation</b>                                                  |                                                                                   |                                                                                                        |                |                                           |
| Dark-operative<br>protochlorophyllide<br>reductase NB-cluster                                   | Cys <sub>3</sub> Asp                                                              | 5.1, 2.3, 1.92                                                                                         |                | 4                                         |
| 8Fe Fd III                                                                                      | Cys <sub>3</sub> Asp                                                              | 5.27, 2.34, 1.62                                                                                       |                | 5                                         |
| <i>Pf.</i> ferredoxin                                                                           | Cys <sub>3</sub> Asp                                                              | 2.10, 1.87, 1.80<br>5.68, 1.35, 1.09<br>5.05, 2.61, 1.72                                               | -405           | 6                                         |
| FNR<br>IscA                                                                                     | Cys <sub>3</sub> Asp                                                              | 2.05, 1.94, 1.89                                                                                       |                |                                           |
| <b>Auxiliary Clusters in RSE</b>                                                                |                                                                                   |                                                                                                        |                |                                           |
| AlbA<br>AuxI                                                                                    | Cys <sub>3</sub>                                                                  | 2.02, 1.92                                                                                             |                | 7                                         |
| anSME<br>AuxI<br>AuxII                                                                          | Cys <sub>4</sub><br>Cys <sub>4</sub>                                              |                                                                                                        |                | 8                                         |
| BioB<br>[2Fe-2S]                                                                                | Cys <sub>3</sub> Arg                                                              |                                                                                                        |                |                                           |
| BtrN<br>AuxI w/ DOIA and SAM                                                                    | Cys <sub>4</sub> <sup>12</sup>                                                    | 1.99, 1.99, 1.83                                                                                       | -760           | 9,10                                      |
| HydG<br>AuxI<br>AuxI w/ Cys <sub>ex</sub> + EDTA<br>AuxI w/ CN <sup>-</sup>                     | Cys <sub>3</sub> (?)<br>Cys <sub>3</sub> Cys <sub>ex</sub><br>Cys <sub>3</sub> CN | 2.03, 1.92, 1.88<br>2.06, 1.90, 1.87<br>2.09, 1.94, 1.93                                               |                | 11<br>12<br>13                            |
| LipA<br>AuxI                                                                                    | Cys <sub>3</sub> Ser                                                              | 2.05, 1.91 (I)                                                                                         |                | 14                                        |
| MiaB<br>AuxI                                                                                    | Cys <sub>3</sub>                                                                  | 2.06, 1.94 <sup>19</sup>                                                                               | -405           | 15,16                                     |
| MoaA<br>AuxI w/o 5'-GTP<br>AuxI w/ 5'-GTP                                                       | Cys <sub>3</sub><br>Cys <sub>3</sub> GTP                                          | 2.062, 1.911<br>2.063, 1.897                                                                           |                | 17                                        |
| NifB<br>AuxI<br>AuxII<br>Aux(?)                                                                 |                                                                                   | 2.062, 1.917, 1.875<br>2.039, 1.923, 1.886<br>2.058, 1.985, 1.909                                      |                | 18                                        |
| PqqE<br>no attribution<br>RS<br>AuxI [2Fe2S] <sup>+</sup><br>AuxI [4Fe4S] <sup>+</sup><br>AuxII | Cys <sub>3</sub><br>Cys <sub>4</sub><br>Cys <sub>4</sub><br>Cys <sub>3</sub> Asp  | 2.06, 1.96, 1.91<br>2.034, 1.918, 1.895<br>2.0049, 1.958, 1.906<br>2.053, 1.922, 1.895<br>not observed |                | 19<br>this work<br>this work<br>this work |

|                                                                                                                                                                                                                                                                                                             |                                      |                                                                                          |                         |          |
|-------------------------------------------------------------------------------------------------------------------------------------------------------------------------------------------------------------------------------------------------------------------------------------------------------------|--------------------------------------|------------------------------------------------------------------------------------------|-------------------------|----------|
| RimO<br>AuxI<br>...AuxI                                                                                                                                                                                                                                                                                     |                                      | 2.05, 1.94                                                                               | -390 (II)<br>-470 (III) | 16<br>20 |
| SkfB<br>WT<br>C117A C121A C124A<br>C380A C385A C387A                                                                                                                                                                                                                                                        |                                      | 2.04, 1.93<br>2.03, 1.92<br>2.03, 1.93                                                   |                         | 21       |
| Tte1186<br>AuxIa<br>AuxIb<br>AuxIIa<br>AuxIIb                                                                                                                                                                                                                                                               |                                      | 2.063, 1.932, 1.880<br>2.022, 1.951, 1.900<br>2.050, 1.926, 1.887<br>2.085, 1.940, 1.867 |                         | 22       |
| TWY1<br>AuxI<br>...AuxI + SAM                                                                                                                                                                                                                                                                               | Cys <sub>3</sub><br>Cys <sub>3</sub> | 2.054, 1.926, 1.842<br>2.055, 1.932, 1.828                                               |                         | 23       |
| (I) Cicchillo noted that this auxiliary cluster in LipA was difficult to reduce in high yield using dithionite.<br>(II) Addition of SAM was shown to induce formation of an S = 3/2 species with features at g = 5.3, 3.3, and 1.0. <sup>21</sup><br>(III) PFE performed on mutant RimO lacking RS cluster. |                                      |                                                                                          |                         |          |

## References:

- (1) Hänzelmann, P., and Schindelin, H. (2004) Crystal structure of the S-adenosylmethionine-dependent enzyme MoaA and its implications for molybdenum cofactor deficiency in humans. *Proc. Natl. Acad. Sci. U. S. A.* 101, 12870–12875.
- (2) Emptage, M. H., Kent, T. A., Kennedy, M. C., Beinert, H., and Münck, E. (1983) Mössbauer and EPR studies of activated aconitase: development of a localized valence state at a subsite of the [4Fe-4S] cluster on binding of citrate. *Proc. Natl. Acad. Sci. U. S. A.* 80, 4674–4678.
- (3) Emptage, M. H., Dreyers, J. L., Kennedy, M. C., and Beinert, H. (1983) Optical and EPR characterization of different species of active and inactive aconitase. *J. Biol. Chem.* 258, 11106–11111.
- (4) Kondo, T., Nomata, J., Fujita, Y., and Itoh, S. (2011) EPR study of 1Asp-3Cys ligated 4Fe-4S iron-sulfur cluster in NB-protein (BchN-BchB) of a dark-operative protochlorophyllide reductase complex. *FEBS Lett.* 585, 214–218.
- (5) Armstrong, F. a, George, S. J., Cammack, R., Hatchikian, E. C., and Thomson, a J. (1989) Electrochemical and spectroscopic characterization of the 7Fe form of ferredoxin III from *Desulfovibrio africanus*. *Biochem. J.* 264, 265–273.
- (6) Conover, R. C., Kowal, a T., Fu, W. G., Park, J. B., Aono, S., Adams, M. W., and Johnson, M. K. (1990) Spectroscopic characterization of the novel iron-sulfur cluster in *Pyrococcus furiosus* ferredoxin. *J. Biol. Chem.* 265, 8533–8541.
- (7) Flühe, L., Knappe, T. A., Gattner, M. J., Schäfer, A., Burghaus, O., Linne, U., and Marahiel,

- M. A. (2012) The radical SAM enzyme AlbA catalyzes thioether bond formation in subtilisin A. *Nat Chem Biol* 8, 350–357.
- (8) Goldman, P. J., Grove, T. L., Sites, L. A., McLaughlin, M. I., Booker, S. J., and Drennan, C. L. (2013) X-ray structure of an AdoMet radical activase reveals an anaerobic solution for formylglycine posttranslational modification. *Proc. Natl. Acad. Sci. U. S. A.* 110, 8519–8524.
- (9) Grove, T. L., Ahlum, J. H., Qin, R. M., Lanz, N. D., Radle, M. I., Krebs, C., and Booker, S. J. (2013) Further Characterization of Cys-Type and Ser-Type Anaerobic Sulfatase Maturing Enzymes Suggests a Commonality in Mechanism of Catalysis. *Biochemistry* 52, 2874–2887.
- (10) Maiocco, S. J., Grove, T. L., Booker, S. J., and Elliott, S. J. (2015) Electrochemical Resolution of the [4Fe-4S] Centers of the AdoMet Radical Enzyme BtrN: Evidence of Proton Coupling and an Unusual, Low-Potential Auxiliary Cluster. *J. Am. Chem. Soc.* 137, 8664–8667.
- (11) Driesener, R. C., Duffus, B. R., Shepard, E. M., Bruzas, I. R., Duschene, K. S., Coleman, N. J.-R., Marrison, A. P. G., Salvadori, E., Kay, C. W. M., Peters, J. W., Broderick, J. B., and Roach, P. L. (2013) Biochemical and kinetic characterization of radical S-adenosyl-L-methionine enzyme HydG. *Biochemistry* 52, 8696–8707.
- (12) Suess, D. L. M., Bürstel, I., De La Paz, L., Kuchenreuther, J. M., Pham, C. C., Cramer, S. P., Swartz, J. R., and Britt, R. D. (2015) Cysteine as a ligand platform in the biosynthesis of the FeFe hydrogenase H cluster. *Proc. Natl. Acad. Sci.* 112, 11455–11460.
- (13) Dinis, P., Suess, D. L. M., Fox, S. J., Harmer, J. E., Driesener, R. C., De La Paz, L., Swartz, J. R., Essex, J. W., Britt, R. D., and Roach, P. L. (2015) X-ray crystallographic and EPR spectroscopic analysis of HydG, a maturase in [FeFe]-hydrogenase H-cluster assembly. *Proc. Natl. Acad. Sci.* 112, 1362–1367.
- (14) Cicchillo, R. M., Lee, K.-H., Baleanu-Gogonea, C., Nesbitt, N. M., Krebs, C., and Booker, S. J. (2004) Escherichia coli Lipoyl Synthase Binds Two Distinct [4Fe-4S] Clusters per Polypeptide. *Biochemistry* 43, 11770–11781.
- (15) Hernández, H. L., Pierrel, F., Elleingand, E., García-Serres, R., Huynh, B. H., Johnson, M. K., Fontecave, M., and Atta, M. (2007) MiaB, a bifunctional radical-S-adenosylmethionine enzyme involved in the thiolation and methylation of tRNA, contains two essential [4Fe-4S] clusters. *Biochemistry* 46, 5140–5147.
- (16) Maiocco, S. J., Arcinas, A. J., Landgraf, B. J., Lee, K. H., Booker, S. J., and Elliott, S. J. (2016) Transformations of the FeS Clusters of the Methylthiotransferases MiaB and RimO, Detected by Direct Electrochemistry. *Biochemistry* 55, 5531–5536.
- (17) Lees, N. S., Hänzelmann, P., Hernandez, H. L., Subramanian, S., Schindelin, H., Johnson, M. K., and Hoffman, B. M. (2009) ENDOR Spectroscopy Shows That Guanine N1 Binds to [4Fe-4S] Cluster II of the S-Adenosylmethionine-Dependent Enzyme MoeA: Mechanistic Implications. *J. Am. Chem. Soc.* 131, 9184–9185.
- (18) Wilcoxon, J., Arragain, S., Scandurra, A. A., Jimenez-Vicente, E., Echavarri-Erasun, C., Pollmann, S., Britt, R. D., and Rubio, L. M. (2016) Electron Paramagnetic Resonance Characterization of Three Iron-Sulfur Clusters Present in the Nitrogenase Cofactor Maturase NifB from Methanocaldococcus infernus. *J. Am. Chem. Soc.* 138, 7468–7471.
- (19) Wecksler, S. R., Stoll, S., Tran, H., Magnusson, O. T., Wu, S.-P., King, D., Britt, R. D., and Klinman, J. P. (2009) Pyrroloquinoline quinone biogenesis: demonstration that PqqE from Klebsiella pneumoniae is a radical S-adenosyl-L-methionine enzyme. *Biochemistry* 48, 10151–10161.
- (20) Molle, T., Moreau, Y., Clemancey, M., Forouhar, F., Ravanat, J.-L., Duraffourg, N., Fourmond, V., Latour, J.-M., Gambarelli, S., Mulliez, E., and Atta, M. (2016) Redox Behavior

of the S-Adenosylmethionine (SAM)-Binding Fe-S Cluster in Methylthiotransferase RimO, toward Understanding Dual SAM Activity. *Biochemistry* 55, 5798–5808.

(21) Flöhe, L., Burghaus, O., Wieckowski, B. M., Giessen, T. W., Linne, U., and Marahiel, M. A. (2013) Two [4Fe-4S] clusters containing radical SAM enzyme SkfB catalyze thioether bond formation during the maturation of the sporulation killing factor. *J Am Chem Soc* 135, 959–962.

(22) Bruender, N. A., Wilcoxon, J., Britt, R. D., and Bandarian, V. (2016) Biochemical and spectroscopic characterization of a radical SAM enzyme involved in the formation of a peptide thioether crosslink. *Biochemistry* 55, 2122-2134.

(23) Perche-Letuvée, P., Kathirvelu, V., Berggren, G., Clemancey, M., Latour, J.-M., Maurel, V., Douki, T., Armengaud, J., Mulliez, E., Fontecave, M., Garcia-Serres, R., Gambarelli, S., and Atta, M. (2012) 4-Demethylwyosine synthase from *Pyrococcus abyssi* is a radical-S-adenosyl-L-methionine enzyme with an additional [4Fe-4S](+2) cluster that interacts with the pyruvate co-substrate. *J. Biol. Chem.* 287, 41174–41185.
